# Supplementary material for: Integrated, Automated, Fast PCR System for Point-Of-Care Molecular Diagnosis of Bacterial Infection
Source: PubMed Central journal article supplement (PMC7827619; doi:10.3390/s21020377), 2021-01-07
Supplement: sensors-21-00377-s001.pdf [file sensors-21-00377-s001.pdf]

## Supplementary Information

# Integrated, automated, fast PCR system for point-of-care molecular diagnosis of bacterial infection

*Dongkyu Lee<sup>1</sup>, Deawook Kim<sup>1,3</sup>, Jounghyuk Han<sup>1,3</sup>, Jongsu Yun<sup>1</sup>, Kang-Ho Lee<sup>1</sup>, Gyu  
Man Kim<sup>3</sup> Ohwon Kwon<sup>1\*</sup>, and Jaejong Lee<sup>2\*</sup>*

<sup>1</sup>Department of Medical Devices, Korea Institute of Machinery and Materials (KIMM),  
Daegu, 42994, Republic of Korea

<sup>2</sup>Nano-Mechanical Systems, Korea Institute of Machinery and Materials (KIMM),  
Daejeon, 34103, Republic of Korea

<sup>3</sup>Department of Mechanical Engineering, Kyungpook National University, Daegu, 41566,  
Republic of Korea

\*Corresponding Author: [owkwon@kimm.re.kr](mailto:owkwon@kimm.re.kr) (O.W.), [jjlee@kimm.re.kr](mailto:jjlee@kimm.re.kr) (J. L.)

**Table S1. Protocols of sample preparation for both manual and automated methods**

|                         | Manual method                                                                                                                                          | Automated method                                                                                                                                                                                 |                                                |
|-------------------------|--------------------------------------------------------------------------------------------------------------------------------------------------------|--------------------------------------------------------------------------------------------------------------------------------------------------------------------------------------------------|------------------------------------------------|
| <b>Cell preparation</b> | centrifugation of Salmonella cell( $1 \times 10^8$ CFU) (1mL) at 9,000RPM                                                                              |                                                                                                                                                                                                  |                                                |
|                         | Removing top liquid on the cell pellet                                                                                                                 |                                                                                                                                                                                                  |                                                |
|                         | Resuspension using 1x PBS solution(Corning Cat No. 21-040-CV)                                                                                          |                                                                                                                                                                                                  |                                                |
|                         | Add Proteinase K (20 $\mu$ l) (Thermo fisher, Cat No. BP1700-100)                                                                                      |                                                                                                                                                                                                  |                                                |
| <b>Lysis</b>            | Add Lysis buffer (200 $\mu$ L)(Qiagen, Cat No. 67563), mixing and reacting for 5min                                                                    | Add lysis buffer (200 $\mu$ l) and magnet bead(20 $\mu$ l) and Isopropanol(300 $\mu$ l) in a tube, and then, take 200 $\mu$ l and transfer it to the lysis well and moving tool for shanking mix |                                                |
| <b>Bead binding</b>     | Add magnet bead(Qiagen, Cat No. 1026883) 20 $\mu$ l and 300 $\mu$ l of isopropanol (Sigma-Aldrich, Cat No. I9516) and pipetting mix for 3min reaction. |                                                                                                                                                                                                  |                                                |
|                         | Separating magnetic bead                                                                                                                               |                                                                                                                                                                                                  | Moving magnet tool to separating magnetic bead |
|                         | Remove top liquid in the tube                                                                                                                          |                                                                                                                                                                                                  |                                                |
|                         |                                                                                                                                                        | Moving magnet tool to Wash I buffer well                                                                                                                                                         |                                                |
| <b>WashI</b>            | Add 800 $\mu$ l of Wash I buffer (Cosmogenetech, Cat No. CMB-007) and vortex mixing                                                                    | Shanking mix (Wash I buffer 200 $\mu$ l)                                                                                                                                                         |                                                |
|                         | Separating magnetic bead                                                                                                                               | Moving magnet tool to separating magnetic bead                                                                                                                                                   |                                                |
|                         | Remove top liquid in the tube                                                                                                                          |                                                                                                                                                                                                  |                                                |
|                         |                                                                                                                                                        | Moving magnet tool to Wash II buffer well                                                                                                                                                        |                                                |
| <b>WashII</b>           | Add 800 $\mu$ l of Wash II buffer (Cosmogenetech, Cat No. CMB-005) and vortex mixing                                                                   | Shanking mix (Wash II buffer 200 $\mu$ l)                                                                                                                                                        |                                                |
|                         | Separating magnetic bead                                                                                                                               | Moving magnet tool to separating magnetic bead                                                                                                                                                   |                                                |
|                         | Remove top liquid in the tube                                                                                                                          |                                                                                                                                                                                                  |                                                |
|                         |                                                                                                                                                        | Moving magnet tool to Elution buffer well                                                                                                                                                        |                                                |
| <b>Elution</b>          | Add 500 $\mu$ l of Elution buffer(Qiagen, Cat No. 19077) 500 $\mu$ l                                                                                   | Shanking mix (Elution buffer 200 $\mu$ l)                                                                                                                                                        |                                                |
|                         | Separating magnetic bead                                                                                                                               | Remove magnetic bead                                                                                                                                                                             |                                                |
|                         | Complete DNA extraction                                                                                                                                | Complete DNA extraction                                                                                                                                                                          |                                                |

### **- The commercial electronics and motors for the automated fast PCR system**

Step motor (FL42STH33-0956A, Devicemart, Korea), Servo motor (HS-311, Hitec Rcd korea Inc., Korea), Step motor driver (A3967, twin chip), and liner bearings and slides (IGUS, Germany) were purchased to fabricate X-Z axis translational stages. Ceramic heater (CB1, Scipia, Korea) and Peltier cooler (TEC1-12706, SMG, Korea) were purchased to generate heating-cooling cycles of amplification chamber. Temperature variations were monitored by thermistor (Th310J39GBSN, Ampenol advanced sensor, USA). Super bright blue 3mm led (ada-301, Devicemart, korea), 466nm fluorescence filter (#86-341, Edmund optics, USA), 520nm fluorescence filter (#67-016, Edmund optics, USA), Raspberry Pi3 and camera were purchased for monitoring fluorescence images. The parts of the system were designed and printed by 3D printer (Stratasys uPrinter professional desktop 3D printer).

### S1. Effects of sample volume on the thermocycle speed

The thermal cycle for samples of volume 20  $\mu\text{L}$  completed 40 cycles in 12.8 min. The small reduction of amplification time is due to the heat transfer limitation by the conical microtube.

Figure S1. The thermal ramp cycles at the various sample volumes; 20  $\mu\text{L}$  (black), 30  $\mu\text{L}$  (red), 40  $\mu\text{L}$  (blue), and 50  $\mu\text{L}$  (green).

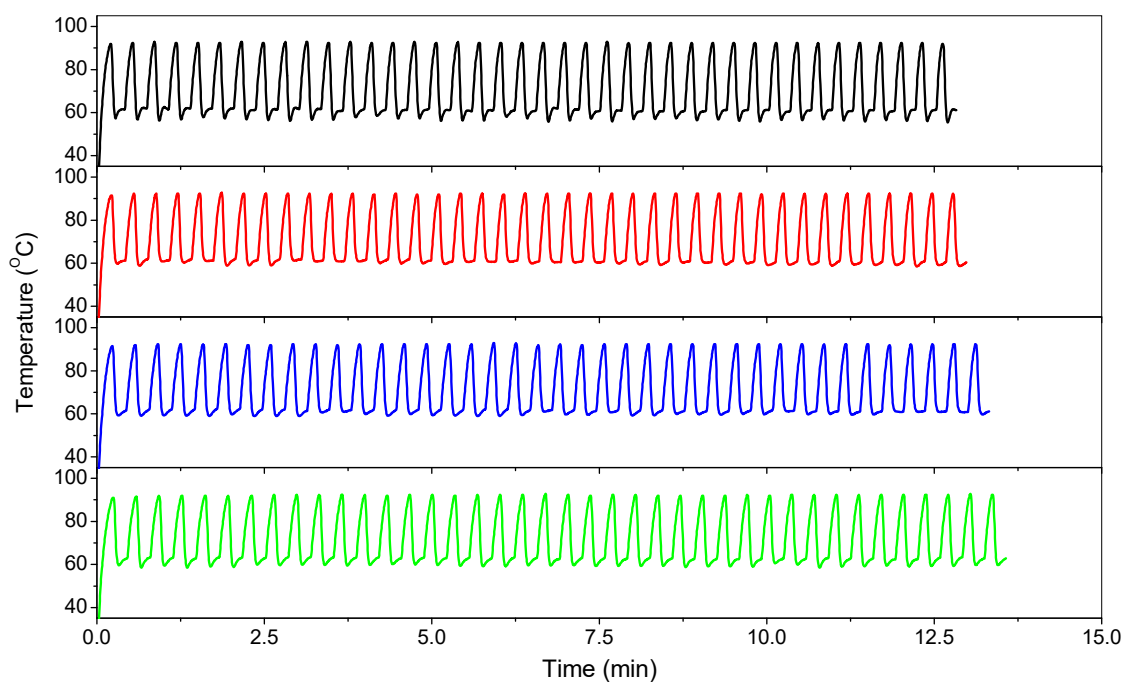

## S2. Effects of heating block temperature on the fluorescence intensity

If the heating block temperature is over 105 °C, variations in the fluorescence intensity was decreased due to denaturation of Taq DNA polymerase.

Figure S2. variations in the fluorescence intensity depending on temperature of the heating block

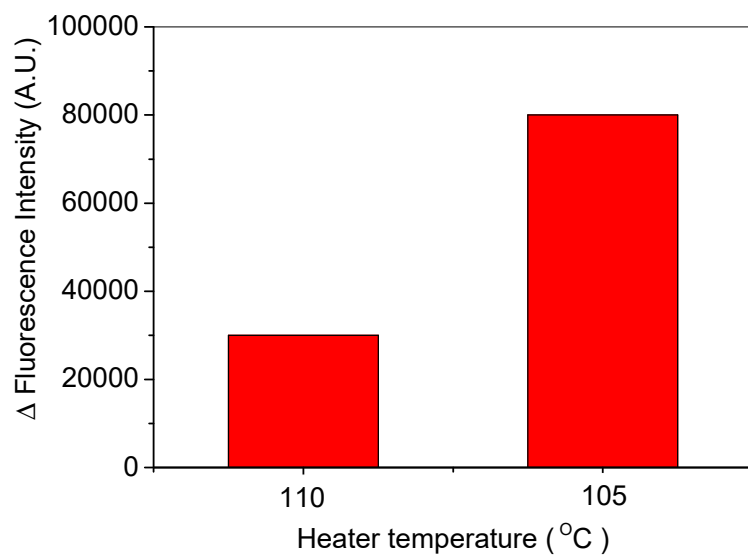

### S3. Analysis of the fluorescence intensity from summing brightness of fluorescence images

The fluorescence image was monitored and analyzed by a single-board microcomputer (Raspberry Pi). The captured image was cut to a size of 280x300 pixels, and then total brightness value was calculated by summing all the brightness values of each pixel.

Figure S3. Methods of fluorescence image analysis; (a) Algorithm of image analysis in the control panel of a single-board microcomputer (Raspberry Pi), (b) a raw full fluorescence image, (c) greyscale of the full image, (d) a captured image of greyscale in a size of 280x300 pixels.

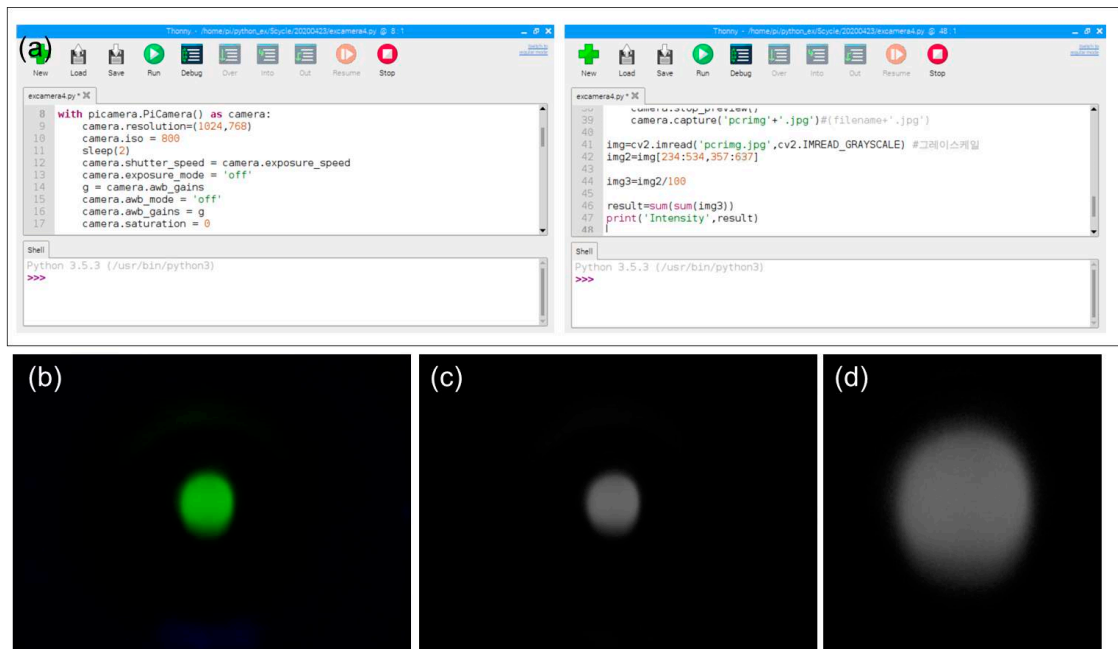

#### S4. Semi-logarithmic plot of Ct versus cycle number for the serial diluted samples.

As dilution increased, the Ct increased and the maximum change in fluorescence intensity at 40 cycles decreased in Figure 6a. The logarithm plot of DNA concentration versus Ct (Figure S4) is linear. The linear trend is generally utilized for quantification analysis.

Figure S4. Semi-logarithmic plot of Ct versus cycle number for the serial diluted samples

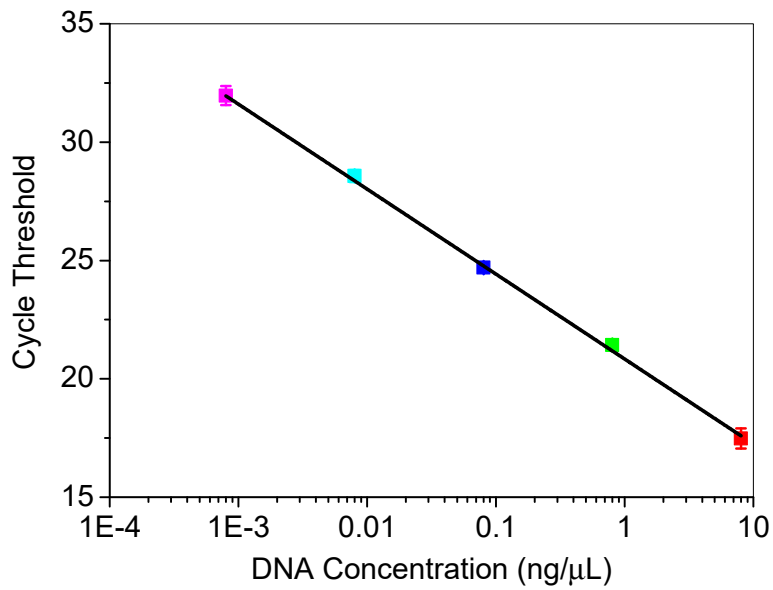

Table S2. Comparison between commercial and developed systems.

| <b>performance/ platform</b>     | <b>Commercial PCR system<br/>(Applied Biosystems)</b> | <b>Commercial Sample preparation machine<br/>(Applied Biosystems)</b> | <b>Automated fast PCR system<br/>(in this paper)</b> |
|----------------------------------|-------------------------------------------------------|-----------------------------------------------------------------------|------------------------------------------------------|
| Sample preparation time          | -                                                     | ~40 min / 1-13 samples                                                | ~5 min / 2 samples                                   |
| Sample preparation method        | -                                                     | membrane with centrifugation                                          | magnet bead method                                   |
| Cycles / completion time         | 40cycles / 38min                                      | -                                                                     | 40cycles / 13.5min                                   |
| Denature temperature             | 95±1°C                                                | -                                                                     | 93±2°C                                               |
| Annealing/elongation temperature | 60±1°C                                                | -                                                                     | 62±2°C                                               |
| Extension time                   | 10 sec                                                | -                                                                     | 10 sec                                               |
| Heating temperature              | 105°C                                                 | -                                                                     | 105°C                                                |
| Cooling temperature              | -                                                     | -                                                                     | 10°C                                                 |
| Heating temperature              | 2.5°C                                                 | -                                                                     | 10.2°C                                               |
| Cooling temperature              | 2.5°C                                                 | -                                                                     | 16.5°C                                               |
| System size                      | 34cm(W) × 49 cm (H)<br>× 41cm (D)                     | 50cm(W) × 55 cm (H) ×<br>57cm (D)                                     | 25cm(W) × 23 cm (H)<br>× 18cm (D)                    |
